# Supplementary material for: Predictions of novel Schistosoma mansoni - human protein interactions consistent with experimental data
Source: PubMed Central journal article supplement (PMC6117258; doi:10.1038/s41598-018-31272-1), 2018-08-30
Supplement: 41598_2018_31272_MOESM1_ESM.pdf [file 41598_2018_31272_MOESM1_ESM.pdf]

1 **Predictions of novel *Schistosoma mansoni* - human protein**  
2 **interactions consistent with experimental data**

3 J. White Bear<sup>1,2,6,&,\*</sup>, Thavy Long<sup>3,4,5,\*</sup>, Danielle Skinner<sup>4</sup>, James H. McKerrow<sup>3,4</sup>

4 **1 Department of Bioengineering and Therapeutic Sciences, Department of**  
5 **Pharmaceutical Chemistry, and California Institute for Quantitative Biosciences,**  
6 **University of California, San Francisco, CA 94158**

7 **2 Graduate Group in Bioinformatics, University of California, San Francisco, CA 94158,**  
8 **USA**

9 **3 Department of Pathology and Sandler Center for Basic Research in Parasitic Diseases,**  
10 **University of California at San Francisco, San Francisco, California 94158, USA**

11 **4 Skaggs School of Pharmacy and Pharmaceutical Sciences, University of California San**  
12 **Diego 9500 Gilman Dr, La Jolla, CA 92093**

13 **5 (Current Address) INRA - InTheRes - UMR 1436, Equipe Transporteurs Membranaires**  
14 **et Résistance; 180, Chemin de Tournefeuille, Toulouse, France**

15 **6 (Current Address) MIT Lincoln Laboratory 244 Wood St. Lexington, MA US**

16 **& Materials & Correspondence: J. White Bear Email: jwbear15@gmail.com**

17 **\* These authors contributed equally to this work.**

# Supplemental Information 1: Cercarial Elastase Interactions

| <b><i>Cercarial Elastase Interactions</i></b> |              |                                                                                   |
|-----------------------------------------------|--------------|-----------------------------------------------------------------------------------|
| <b>S. mansoni</b>                             | <b>Human</b> | <b>Human Protein</b>                                                              |
| Smp_112090                                    | 148613878 gi | acrosin precursor [Homo sapiens]                                                  |
| SMP_006510                                    | 148613878 gi | acrosin precursor [Homo sapiens],Acrosin precursor (EC 3.4.21.10) [Contains: Ac   |
| SMP_119130                                    | 38504669 gi  | serine (or cysteine) proteinase inhibitor, clade B (ovalbumin), member 8 [Homo    |
| SMP_006510                                    | 38504669 gi  | serine (or cysteine) proteinase inhibitor, clade B (ovalbumin), member 8 [Homo    |
| SMP_006510                                    | 21359871 gi  | SPARC-like 1 [Homo sapiens]                                                       |
| Smp_006520                                    | 134268640 gi | tectorin alpha precursor [Homo sapiens]                                           |
| SMP_006510                                    | 134268640 gi | tectorin alpha precursor [Homo sapiens],                                          |
| SMP_112090                                    | 134268640 gi | tectorin alpha precursor [Homo sapiens],                                          |
| Smp_119130                                    | 21614538 gi  | (O43464) Splice isoform 2 of O43464                                               |
| SMP_006510                                    | 31563528 gi  | (O95925) Splice isoform 2 of O95925,AF286369_1 eppin-2,serine protease inhibitor  |
| Smp_112090                                    | 58533163 gi  | (P14210) Splice isoform 2 of P14210                                               |
| SMP_006510                                    | 58533163 gi  | (P14210) Splice isoform 2 of P14210,Hepatocyte growth factor, heavy chain precur  |
| Smp_112090                                    | 58533170 gi  | (P14210) Splice isoform 3 of P14210                                               |
| SMP_006510                                    | 58533170 gi  | (P14210) Splice isoform 3 of P14210,HEPATOCYTE GROWTH FACTOR                      |
| Smp_006520                                    | 5453652 gi   | (P19883) Splice isoform 2 of P19883                                               |
| SMP_006510                                    | 5453652 gi   | (P19883) Splice isoform 2 of P19883,follistatin precursor                         |
| Smp_006510                                    | 21536452 gi  | (P35030) Splice isoform C of P35030,(P35030) Splice isoform C of P35030,Protease  |
| Smp_006510                                    | 9665236 gi   | (Q9UKR0) Splice isoform 2 of Q9UKR0,(Q9UKR0) Splice isoform 2 of Q9UKR0,kallikre  |
| Smp_006510                                    | 153791781 gi | 48 kDa protein [Homo sapiens],48 kDa protein [Homo sapiens],Uncharacterized prot  |
| Smp_006520                                    | 42544239 gi  | Adipsin/complement factor D precursor (EC 3.4.21.46) (ComplementDE factor D, p    |
| SMP_006510                                    | 42544239 gi  | Adipsin/complement factor D precursor (EC 3.4.21.46) (ComplementDE factor D, p    |
| Smp_119130                                    | 89142741 gi  | AF243527_5 serine protease                                                        |
| SMP_006510                                    | 89142741 gi  | AF243527_5 serine protease,serine protease prostase,Q9Y5K2_chr19:56102005-561058  |
| SMP_006510                                    | 54873613 gi  | Agrin                                                                             |
| SMP_006510                                    | 55743100 gi  | alpha 3 type VI collagen isoform 2 precursor [Homo sapiens]                       |
| SMP_006510                                    | 55743104 gi  | alpha 3 type VI collagen isoform 4 precursor [Homo sapiens].                      |
| SMP_006510                                    | 4502067 gi   | Alpha-1-microglobulin/bikunin (Growth-inhibiting protein 19),,AMBIP protein precu |
| SMP_112090                                    | 115583663 gi | Alpha-2-antiplasmin precursor (Alpha-2-plasmin inhibitor) (Alpha-2-PI)DE (Alph    |
| SMP_006510                                    | 115583663 gi | Alpha-2-antiplasmin precursor (Alpha-2-plasmin inhibitor) (Alpha-2-PI)DE (Alph    |
| Smp_112090                                    | 41406055 gi  | Amyloid beta (A4) protein (Peptidase nexin-II, Alzheimer disease)                 |
| SMP_006510                                    | 41406055 gi  | Amyloid beta (A4) protein (Peptidase nexin-II, Alzheimer disease),Amyloid beta A  |
| SMP_119130                                    | 4502147 gi   | Amyloid-like protein 2 precursor (Amyloid protein homolog) (APPH)DE (CDEI box-    |

## Supplemental Information 1: Cercarial Elastase Interactions

|            |              |                                                                                  |
|------------|--------------|----------------------------------------------------------------------------------|
| SMP_006510 | 4502147 gi   | Amyloid-like protein 2 precursor (Amyloid protein homolog) (APPH)DE (CDEI box-   |
| SMP_119130 | 4557287 gi   | Angiotensinogen (Serine (Or cysteine) proteinase inhibitor, clade ADE (Alpha-1   |
| SMP_006510 | 4557287 gi   | Angiotensinogen (Serine (Or cysteine) proteinase inhibitor, clade ADE (Alpha-1   |
| SMP_006510 | 4507065 gi   | Antileukoproteinase 1 precursor (ALP) (HUSI-1) (Seminal proteinaseDE inhibitor   |
| Smp_119130 | 4507065 gi   | Antileukoproteinase 1 precursor (ALP) (HUSI-1) (Seminal proteinaseDE inhibitor   |
| Smp_006510 | 13346502 gi  | Apolipoprotein (A) related gene C (Lipoprotein, Lp(A)-like 2,),Apolipoprotein (A |
| Smp_006520 | 41350214 gi  | Asporin (LRR class 1)                                                            |
| Smp_112090 | 29244926 gi  | atrial natriuretic peptide-converting enzyme [Homo sapiens]                      |
| Smp_006510 | 11342670 gi  | Azurocidin 1, preproprotein,Azurocidin 1, preproprotein,Azurocidin precursor (Ca |
| Smp_006510 | 11545839 gi  | Brain-specific serine protease-4 (Serine protease PRSS22),Brain-specific serine  |
| Smp_006510 | 22208982 gi  | Breast normal epithelial cell associated serine protease (KallikreinDE 10),Bre   |
| Smp_006510 | 62526043 gi  | Caldecrin precursor (EC 3.4.21.2) (Chymotrypsin C),Caldecrin precursor (EC 3.4.2 |
| Smp_006520 | 4502997 gi   | Carboxypeptidase A1 precursor (EC 3.4.17.1)                                      |
| SMP_119130 | 4502997 gi   | Carboxypeptidase A1 precursor (EC 3.4.17.1),Carboxypeptidase A1 (Pancreatic),Car |
| Smp_006520 | 4502999 gi   | CARBOXYPEPTIDASE A2 PRECURSOR (EC 3.4.17.15)                                     |
| Smp_119130 | 126273559 gi | carboxypeptidase B2 (plasma, carboxypeptidase U), isoform CRA_a                  |
| SMP_006510 | 22202611 gi  | Carboxypeptidase D,,Similar to carboxypeptidase D (CPD protein),Carboxypeptidase |
| Smp_112090 | 4503149 gi   | Cathepsin G precursor (EC 3.4.21.20) (CG)                                        |
| SMP_006510 | 4503149 gi   | Cathepsin G precursor (EC 3.4.21.20) (CG),Cathepsin G precursor (EC 3.4.21.20) ( |
| SMP_006510 | 58218970 gi  | cDNA FLJ55455, highly similar to Polyserase-2 (EC 3.4.21.-)                      |
| Smp_006510 | 24308541 gi  | CDNA FLJ90724 fis, clone PLACE1009279, weakly similar toDE Physiologically act   |
| SMP_006510 | 10190748 gi  | CEGP1 protein                                                                    |
| Smp_112090 | 4502907 gi   | Chymase precursor (EC 3.4.21.39) (Mast cell protease I)                          |
| SMP_006510 | 4502907 gi   | Chymase precursor (EC 3.4.21.39) (Mast cell protease I),Chymase precursor (EC 3. |
| Smp_006510 | 4503137 gi   | Chymotrypsin-like protease CTRL-1 precursor (EC 3.4.21.-),Chymotrypsin-like prot |
| Smp_006520 | 118498341 gi | chymotrypsinogen B precursor [Homo sapiens]                                      |
| Smp_112090 | 118498350 gi | chymotrypsinogen B2 precursor [Homo sapiens]                                     |
| Smp_006510 | 4503649 gi   | Coagulation factor IX (Plasma thromboplastic component, ChristmasDE disease, h   |
| Smp_119130 | 10518503 gi  | Coagulation factor VII (Serum prothrombin conversion accelerator)                |
| SMP_006510 | 10518503 gi  | Coagulation factor VII (Serum prothrombin conversion accelerator),Coagulation fa |
| Smp_119130 | 4503645 gi   | Coagulation factor VII (Serum prothrombin conversion accelerator)DE (FVII coag   |
| SMP_006510 | 4503645 gi   | Coagulation factor VII (Serum prothrombin conversion accelerator)DE (FVII coag   |
| Smp_006510 | 4503625 gi   | Coagulation factor X,Coagulation factor X,Coagulation factor X precursor (EC 3.4 |
| SMP_006510 | 145275213 gi | coagulation factor XII precursor [Homo sapiens]                                  |
| Smp_006520 | 4502961 gi   | COLLAGEN ALPHA 1(VII) CHAIN PRECURSOR (LONG-CHAIN COLLAGEN) (LCDE COLLAGEN)      |
| SMP_006510 | 4502961 gi   | COLLAGEN ALPHA 1(VII) CHAIN PRECURSOR (LONG-CHAIN COLLAGEN) (LCDE COLLAGEN),Co   |

## Supplemental Information 1: Cercarial Elastase Interactions

|            |              |                                                                                    |
|------------|--------------|------------------------------------------------------------------------------------|
| SMP_006510 | 55743098 gi  | collagen alpha-3(VI) chain isoform 1 precursor [Homo sapiens]                      |
| SMP_006510 | 55743102 gi  | collagen alpha-3(VI) chain isoform 3 precursor [Homo sapiens]                      |
| SMP_006510 | 55743106 gi  | collagen alpha-3(VI) chain isoform 5 precursor [Homo sapiens]                      |
| Smp_119130 | 93141047 gi  | Collagen type XII alpha 1                                                          |
| Smp_006510 | 7706083 gi   | Complement C1r-like proteinase, Complement C1r-like proteinase, Q9NZP8_chr12:71401 |
| Smp_006510 | 4502495 gi   | Complement C1s subcomponent precursor (EC 3.4.21.42) (C1 esterase)DE [Contains     |
| Smp_112090 | 119392081 gi | Complement factor I precursor (EC 3.4.21.45) (C3B/C4B inactivator)[Contains: Com   |
| SMP_006510 | 119392081 gi | Complement factor I precursor (EC 3.4.21.45) (C3B/C4B inactivator)[Contains: Com   |
| Smp_006510 | 21264359 gi  | Complement factor MASP-3 (Mannan-binding lectin serine protease 1, DE isoform 2    |
| Smp_119130 | 92110053 gi  | CUB and Sushi multiple domains 2                                                   |
| Smp_119130 | 10092639 gi  | Cysteine-rich motor neuron 1                                                       |
| SMP_112090 | 10092639 gi  | Cysteine-rich motor neuron 1, Q9NZV1_chr2:36557971-36750376_G9V Cysteine-rich rep  |
| SMP_006510 | 10092639 gi  | Cysteine-rich motor neuron 1, Q9NZV1_chr2:36557971-36750376_G9V Cysteine-rich rep  |
| Smp_006520 | 110735443 gi | DJ894D12.3 (Delta-like 1 (Mouse) homolog)                                          |
| SMP_119130 | 110735443 gi | DJ894D12.3 (Delta-like 1 (Mouse) homolog), 000548_chr6:170448474-170455736_R502 D  |
| SMP_006510 | 4505787 gi   | Elafin precursor (Elastase-specific inhibitor) (ESI) (Skin-derived DE antileuko    |
| Smp_006520 | 4505787 gi   | Elafin precursor (Elastase-specific inhibitor) (ESI) (Skin-derived DE antileuko    |
| Smp_006520 | 58331209 gi  | Elastase 1, pancreatic                                                             |
| SMP_006510 | 58331209 gi  | Elastase 1, pancreatic, Elastase-1 precursor (EC 3.4.21.36),                       |
| Smp_006510 | 4503549 gi   | Elastase 2, neutrophil, Elastase 2, neutrophil, Leukocyte elastase precursor (EC 3 |
| Smp_112090 | 58331211 gi  | Elastase 2B, preproprotein                                                         |
| SMP_006510 | 58331211 gi  | Elastase 2B, preproprotein, Elastase 2B, Elastase 2B., Pancreatic elastase IIB     |
| Smp_112090 | 6679625 gi   | Elastase 3B, pancreatic                                                            |
| SMP_006510 | 6679625 gi   | Elastase 3B, pancreatic,                                                           |
| Smp_006510 | 15559207 gi  | Elastase-2A precursor (EC 3.4.21.71), Elastase-2A precursor (EC 3.4.21.71), Elasta |
| Smp_006510 | 58331214 gi  | Elastase-3A precursor (EC 3.4.21.70) (Elastase IIIA) (Protease E), Elastase-3A pr  |
| SMP_006510 | 50659100 gi  | ELGC699                                                                            |
| Smp_006510 | 4506151 gi   | Enteropeptidase precursor (EC 3.4.21.9) (Enterokinase) (Serine protease 7) [Conta  |
| Smp_112090 | 117956391 gi | EOS protein (Hypothetical protein)                                                 |
| SMP_006510 | 117956391 gi | EOS protein (Hypothetical protein), PRSS33 protein (Protease, serine, 33), PRSS33  |
| Smp_006520 | 21614533 gi  | eosinophil serine protease 1 splicing variant                                      |
| SMP_006510 | 21614533 gi  | eosinophil serine protease 1 splicing variant, (Q9Y6M0) Splice isoform 3 of Q9Y6M  |
| Smp_006510 | 12408682 gi  | Epididymal sperm-binding protein 1 (Epididymal secretory protein 12)DE (hE12),     |
| SMP_119130 | 10732863 gi  | Eppin precursor (Epididymal protease inhibitor) (Serine protease DE inhibitor-I    |
| SMP_006510 | 10732863 gi  | Eppin precursor (Epididymal protease inhibitor) (Serine protease DE inhibitor-I    |
| Smp_006520 | 14211875 gi  | Esophagus cancer-related gene-2                                                    |

## Supplemental Information 1: Cercarial Elastase Interactions

|            |              |                                                                                  |
|------------|--------------|----------------------------------------------------------------------------------|
| SMP_112090 | 14211875 gi  | Esophagus cancer-related gene-2,,Esophagus cancer-related gene-2 protein precurs |
| SMP_006510 | 14211875 gi  | Esophagus cancer-related gene-2,,Esophagus cancer-related gene-2 protein precurs |
| Smp_112090 | 71040111 gi  | Fibromodulin,                                                                    |
| SMP_006510 | 5901956 gi   | Follistatin-related protein 1 precursor (Follistatin-like 1),                    |
| SMP_119130 | 5901956 gi   | Follistatin-related protein 1 precursor (Follistatin-like 1),,Follistatin-relate |
| SMP_006510 | 5031701 gi   | Follistatin-related protein 3 precursor (Follistatin-like 3)DE (Follistatin-re   |
| SMP_006510 | 54792136 gi  | follistatin-related protein 4 precursor [Homo sapiens]                           |
| SMP_006510 | 50363221 gi  | Full-length cDNA clone CS0DE007YP21 of Placenta of Homo sapiensDE (human) (Ful   |
| Smp_112090 | 5453676 gi   | Granzyme A precursor (EC 3.4.21.78) (Cytotoxic T-lymphocyte proteinase1) (Hanukk |
| SMP_006510 | 5453676 gi   | Granzyme A precursor (EC 3.4.21.78) (Cytotoxic T-lymphocyte proteinase1) (Hanukk |
| Smp_112090 | 4758494 gi   | Granzyme B precursor (EC 3.4.21.79) (T-cell serine protease 1-3E)(Cytotoxic T-ly |
| SMP_006510 | 4758494 gi   | Granzyme B precursor (EC 3.4.21.79) (T-cell serine protease 1-3E)(Cytotoxic T-ly |
| Smp_006510 | 15529990 gi  | Granzyme H precursor (EC 3.4.21.-) (Cytotoxic T-lymphocyte proteinase)DE (Cath   |
| Smp_006510 | 4504235 gi   | Granzyme K precursor (EC 3.4.21.-) (Granzyme-3) (NK-tryptase-2) (NK-DE TRYP-2)   |
| Smp_112090 | 4885369 gi   | Granzyme M precursor (EC 3.4.21.-) (Met-ase) (Natural killer cellgranular protea |
| SMP_006510 | 4885369 gi   | Granzyme M precursor (EC 3.4.21.-) (Met-ase) (Natural killer cellgranular protea |
| Smp_006510 | 4826762 gi   | Haptoglobin,Haptoglobin,P00738_chr16:71864828-71871062_S243P_G248R_T372A_D397H H |
| SMP_006510 | 45580723 gi  | haptoglobin-related protein precursor [Homo sapiens]                             |
| SMP_006510 | 169217813 gi | hCG2002962, trypsin<br>temporary enti hCG2002962"                                |
| Smp_119130 | 126012571 gi | Heparan sulfate proteoglycan 2 (Perlecan)                                        |
| SMP_006520 | 73858566 gi  | Heparin cofactor 2 precursor (Heparin cofactor II) (HC-II) (ProteaseDE inhibit   |
| SMP_006510 | 73858566 gi  | Heparin cofactor 2 precursor (Heparin cofactor II) (HC-II) (ProteaseDE inhibit   |
| Smp_006510 | 4504383 gi   | Hepatocyte growth factor activator,Hepatocyte growth factor activator,Hepatocyte |
| Smp_006510 | 74027265 gi  | hepatocyte growth factor activator inhibitor,hepatocyte growth factor activator  |
| Smp_112090 | 33859835 gi  | Hepatocyte growth factor precursor (Scatter factor) (SF)DE (Hepatopoeitin A) [   |
| SMP_006510 | 33859835 gi  | Hepatocyte growth factor precursor (Scatter factor) (SF)DE (Hepatopoeitin A) [   |
| Smp_112090 | 4758502 gi   | HGF activator like protein (Hyaluronan binding protein 2)                        |
| SMP_006510 | 4758502 gi   | HGF activator like protein (Hyaluronan binding protein 2),Q14520_chr10:114977468 |
| Smp_119130 | 26787982 gi  | Homo sapiens clone 23888 mRNA sequence (IL15RA protein)                          |
| SMP_006510 | 93141001 gi  | HSAJ1454,AAQ89332_chr4:168351965-168851214_R97H_I112V,,HSAJ1454                  |
| SMP_112090 | 54607080 gi  | Hypothetical 47.4 kDa protein,Unknown (protein for MGC:21282,Carboxypeptidase B  |
| SMP_006520 | 21361302 gi  | Hypothetical 48.5 kDa protein, serine (or cysteine) proteinase inhibitor, clade  |
| SMP_006510 | 21361302 gi  | Hypothetical 48.5 kDa protein, serine (or cysteine) proteinase inhibitor, clade  |
| Smp_119130 | 157738643 gi | Hypothetical protein DKFZp434G0625                                               |
| SMP_119130 | 4507171 gi   | Hypothetical protein DKFZp468G1528,P09486_chr5:151071645-151084259_P19S_T128I_R1 |

## Supplemental Information 1: Cercarial Elastase Interactions

|            |              |                                                                                  |
|------------|--------------|----------------------------------------------------------------------------------|
| SMP_006510 | 4507171 gi   | Hypothetical protein DKFZp468G1528,P09486_chr5:151071645-151084259_P19S_T128I_R1 |
| Smp_006510 | 38505209 gi  | Hypothetical protein DKFZp686A06175,Hypothetical protein DKFZp686A06175,         |
| SMP_006510 | 38679890 gi  | Hypothetical protein FLJ46651 (Organic anion transporter OATP-DE M1)             |
| Smp_112090 | 4506115 gi   | Hypothetical protein PROC                                                        |
| SMP_006510 | 4506115 gi   | Hypothetical protein PROC,Vitamin K-dependent protein C precursor (EC 3.4.21.69) |
| Smp_006520 | 5454114 gi   | Hypothetical protein TFPI                                                        |
| SMP_119130 | 5454114 gi   | Hypothetical protein TFPI,P10646_chr2:188534209-188571038_V292M TISSUE FACTOR PA |
| SMP_006510 | 5454114 gi   | Hypothetical protein TFPI,P10646_chr2:188534209-188571038_V292M TISSUE FACTOR PA |
| SMP_112090 | 61743916 gi  | Hypothetical protein,CPA4 protein,Carboxypeptidase A4 (Carboxypeptidase A4, isof |
| SMP_006510 | 122937420 gi | inactive serine protease 54 precursor [Homo sapiens]                             |
| SMP_112090 | 4504619 gi   | Insulin-like growth factor-binding protein 7 precursor (IGFBP-7) (IBP-DE 7) (I   |
| SMP_006510 | 4504619 gi   | Insulin-like growth factor-binding protein 7 precursor (IGFBP-7) (IBP-DE 7) (I   |
| SMP_006520 | 20127446 gi  | Integrin beta-5 precursor,P18084_chr3:125803374-125926748_T193A_L333F_L428V_R431 |
| Smp_119130 | 4504649 gi   | Interleukin 15 receptor, alpha                                                   |
| Smp_119130 | 117306176 gi | Kallikrein 5 splice variant 2 (Kallikrein 5) (Kallikrein 5 spliceDE variant 1)   |
| SMP_006510 | 117306176 gi | Kallikrein 5 splice variant 2 (Kallikrein 5) (Kallikrein 5 spliceDE variant 1)   |
| Smp_112090 | 61744424 gi  | Kallikrein 6                                                                     |
| SMP_006510 | 61744424 gi  | Kallikrein 6,Kallikrein 6.,Kallikrein-6 precursor (EC 3.4.21.-) (Protease M) (Ne |
| Smp_006510 | 29366812 gi  | Kallikrein 9,Kallikrein 9,Kallikrein 9.,Kallikrein-9 precursor (EC 3.4.21.-) (Ka |
| Smp_006520 | 5803199 gi   | Kallikrein-11 precursor (EC 3.4.21.-) (Hippostasin) (Trypsin-likeDE protease)    |
| SMP_006510 | 5803199 gi   | Kallikrein-11 precursor (EC 3.4.21.-) (Hippostasin) (Trypsin-likeDE protease),   |
| Smp_112090 | 22208987 gi  | Kallikrein-12 precursor (EC 3.4.21.-) (Kallikrein-like protein 5)DE (KLK-L5)     |
| SMP_006510 | 22208987 gi  | Kallikrein-12 precursor (EC 3.4.21.-) (Kallikrein-like protein 5)DE (KLK-L5),K   |
| Smp_112090 | 11496281 gi  | Kallikrein-13 precursor (EC 3.4.21.-) (Kallikrein-like protein 4)DE (KLK-L4)     |
| SMP_006510 | 11496281 gi  | Kallikrein-13 precursor (EC 3.4.21.-) (Kallikrein-like protein 4)DE (KLK-L4),K   |
| Smp_119130 | 20302143 gi  | Kallikrein-15 precursor (EC 3.4.21.-) (ACO protease)                             |
| SMP_006510 | 20302143 gi  | Kallikrein-15 precursor (EC 3.4.21.-) (ACO protease),Kallikrein-15 precursor (EC |
| Smp_112090 | 5031829 gi   | Kallikrein-2 precursor (EC 3.4.21.35) (Tissue kallikrein-2) (GlandularDE kall    |
| SMP_006510 | 5031829 gi   | Kallikrein-2 precursor (EC 3.4.21.35) (Tissue kallikrein-2) (GlandularDE kall    |
| Smp_006510 | 21327705 gi  | Kallikrein-7 precursor (EC 3.4.21.-) (hK7) (Stratum corneumDE chymotryptic enz   |
| Smp_006510 | 91823048 gi  | Kallikrein-related peptidase 14,Kallikrein-related peptidase 14,Kallikrein-relat |
| SMP_006520 | 19923632 gi  | Kazal-type serine protease inhibitor domain 1 (FKSG28) (Novel kazal-DE type se   |
| SMP_006510 | 19923632 gi  | Kazal-type serine protease inhibitor domain 1 (FKSG28) (Novel kazal-DE type se   |
| Smp_006520 | 5901992 gi   | Keratocan precursor (KTN) (Keratan sulfate proteoglycan keratocan)               |
| SMP_006510 | 20302147 gi  | KLK15 splice variant 3                                                           |
| SMP_112090 | 32313599 gi  | Kunitz-type protease inhibitor 1 precursor (Hepatocyte growth factorDE activat   |

## Supplemental Information 1: Cercarial Elastase Interactions

|            |              |                                                                                  |
|------------|--------------|----------------------------------------------------------------------------------|
| SMP_006510 | 32313599 gi  | Kunitz-type protease inhibitor 1 precursor (Hepatocyte growth factorDE activat   |
| Smp_119130 | 38045910 gi  | Laminin alpha 3 splice variant b1                                                |
| Smp_006510 | 116292750 gi | Lipoprotein, Lp(A),Lipoprotein, Lp(A),Lipoprotein, Lp(A),,OTTHUMP00000017543     |
| SMP_006520 | 93102379 gi  | Low-density lipoprotein receptor-related protein 1B precursor (Low-DE density    |
| Smp_006510 | 93102379 gi  | Low-density lipoprotein receptor-related protein 1B precursor (Low-DE density    |
| Smp_112090 | 31543212 gi  | Macrophage stimulating 1 (Hepatocyte growth factor-like)                         |
| SMP_006510 | 31543212 gi  | Macrophage stimulating 1 (Hepatocyte growth factor-like),Macrophage stimulating  |
| SMP_006510 | 21264357 gi  | mannan-binding lectin serine protease 1 isoform 1 precursor [Homo sapiens]       |
| Smp_112090 | 21264363 gi  | Mannan-binding lectin serine protease 2                                          |
| SMP_006510 | 21264363 gi  | Mannan-binding lectin serine protease 2,OTTHUMP00000044363,                      |
| Smp_112090 | 34098976 gi  | Marapsin 2 precursor                                                             |
| SMP_006510 | 34098976 gi  | Marapsin 2 precursor,Marapsin 2 precursor (Marapsin 2),                          |
| Smp_006510 | 4503001 gi   | Mast cell carboxypeptidase A precursor (EC 3.4.17.1) (MC-CPA)(Carboxypeptidase A |
| SMP_006510 | 68508970 gi  | mast cell tryptase beta III                                                      |
| SMP_006510 | 151301154 gi | mucin-6 precursor [Homo sapiens]                                                 |
| SMP_006510 | 28212222 gi  | Multivalent protease inhibitor protein,                                          |
| SMP_006520 | 28212222 gi  | Multivalent protease inhibitor protein,,Multivalent protease inhibitor protein   |
| Smp_006510 | 71361688 gi  | Myeloblastin precursor (EC 3.4.21.76) (Leukocyte proteinase 3) (PR-3)DE (PR3)    |
| Smp_112090 | 6005844 gi   | Neuropsin precursor (EC 3.4.21.-) (NP) (Kallikrein-8) (Ovasin) (SerineDE prote   |
| SMP_006510 | 6005844 gi   | Neuropsin precursor (EC 3.4.21.-) (NP) (Kallikrein-8) (Ovasin) (SerineDE prote   |
| Smp_006510 | 21464127 gi  | neuropsin type2,neuropsin type2,(O60259) Splice isoform 2 of O60259              |
| Smp_006520 | 4506143 gi   | Neurotrypsin precursor (EC 3.4.21.-) (Serine protease 12) (Motopsin)(Leydin)     |
| SMP_006510 | 4506143 gi   | Neurotrypsin precursor (EC 3.4.21.-) (Serine protease 12) (Motopsin)(Leydin),Neu |
| Smp_119130 | 55770876 gi  | Notch4                                                                           |
| Smp_006520 | 122937343 gi | Novel protein similar to mouse Jedi soluble isoform 736 protein                  |
| SMP_006510 | 19923780 gi  | organic anion transport polypeptide 2                                            |
| SMP_006510 | 7019531 gi   | Organic anion transporter OATP-D                                                 |
| SMP_112090 | 39777594 gi  | Organic anion transporter OATP-E (Colon organic anion transporter)DE (Organic    |
| SMP_006510 | 39777594 gi  | Organic anion transporter OATP-E (Colon organic anion transporter)DE (Organic    |
| Smp_006510 | 4506121 gi   | OTTHUMP00000018738,OTTHUMP00000018738,Protein Z, vitamin K-dependent plasma glyc |
| SMP_119130 | 4506121 gi   | OTTHUMP00000018738,Protein Z, vitamin K-dependent plasma glycoprotein,P22891_chr |
| Smp_112090 | 110815798 gi | ovochoymase-1 precursor [Homo sapiens]                                           |
| Smp_112090 | 148231605 gi | ovochoymase-2 precursor [Homo sapiens]                                           |
| SMP_006520 | 45505132 gi  | Pancreatic secretory trypsin inhibitor precursor (Tumor-associatedDE trypsin i   |
| Smp_112090 | 45505132 gi  | Pancreatic secretory trypsin inhibitor precursor (Tumor-associatedDE trypsin i   |
| SMP_006510 | 45505132 gi  | Pancreatic secretory trypsin inhibitor precursor (Tumor-associatedDE trypsin i   |

## Supplemental Information 1: Cercarial Elastase Interactions

|            |              |                                                                                  |
|------------|--------------|----------------------------------------------------------------------------------|
| SMP_006510 | 145309328 gi | papilin precursor [Homo sapiens]                                                 |
| SMP_112090 | 20336242 gi  | PC1,,PC1                                                                         |
| Smp_119130 | 126273569 gi | Plasma carboxypeptidase B2, isoform a preproprotein (CarboxypeptidaseDE B2) (P   |
| Smp_006520 | 4505881 gi   | Plasminogen                                                                      |
| SMP_006510 | 4505881 gi   | Plasminogen,Plasminogen precursor (EC 3.4.21.7) [Contains: Plasmin heavy chain A |
| SMP_006510 | 87196600 gi  | Polyserase-3                                                                     |
| SMP_006510 | 169172917 gi | PREDICTED: hypothetical protein LOC346702 [Homo sapiens]                         |
| SMP_006510 | 169163549 gi | PREDICTED: hypothetical protein LOC646960 [Homo sapiens]                         |
| Smp_006520 | 169217813 gi | PREDICTED: hypothetical protein [Homo sapiens].                                  |
| SMP_006510 | 169163744 gi | PREDICTED: similar to ACR [Homo sapiens]                                         |
| SMP_006510 | 169173186 gi | PREDICTED: similar to hCG1643218 [Homo sapiens]                                  |
| SMP_006510 | 169165225 gi | PREDICTED: similar to hCG1786642 [Homo sapiens]                                  |
|            |              | PREDICTED: similar to hCG1786642"                                                |
| SMP_006510 | 169164530 gi | PREDICTED: similar to hCG1818432 [Homo sapiens]                                  |
| SMP_006510 | 169179025 gi | PREDICTED: similar to hCG31140 [Homo sapiens]                                    |
| SMP_006510 | 169202626 gi | PREDICTED: similar to mucin 5, partial [Homo sapiens]                            |
| SMP_006510 | 169163027 gi | PREDICTED: similar to Putative acrosin-like protease [Homo sapiens]              |
| Smp_112090 | 4504875 gi   | preprokallikrein (AA -24 to 238)                                                 |
| SMP_006510 | 4504875 gi   | preprokallikrein (AA -24 to 238),AF243527_1 renal kallikrein,                    |
| Smp_119130 | 26006869 gi  | Probable protease inhibitor WAP12a precursor                                     |
| SMP_006510 | 26006869 gi  | Probable protease inhibitor WAP12a precursor,Q8IUB3_chr20:44998901-45000060_L8P_ |
| Smp_112090 | 26006867 gi  | Probable protease inhibitor WAP12b precursor                                     |
| SMP_006510 | 26006867 gi  | Probable protease inhibitor WAP12b precursor,                                    |
| Smp_112090 | 22779936 gi  | Probable protease inhibitor WAP6                                                 |
| SMP_006510 | 22779936 gi  | Probable protease inhibitor WAP6,                                                |
| Smp_112090 | 22129776 gi  | Probable serine protease HTRA3 precursor (EC 3.4.21.-) (High-DE temperature re   |
| SMP_006510 | 22129776 gi  | Probable serine protease HTRA3 precursor (EC 3.4.21.-) (High-DE temperature re   |
| Smp_112090 | 4506153 gi   | Prostasin precursor (EC 3.4.21.-) (Serine protease 8) [Contains:Prostasin light  |
| SMP_006510 | 4506153 gi   | Prostasin precursor (EC 3.4.21.-) (Serine protease 8) [Contains:Prostasin light  |
| Smp_119130 | 71834857 gi  | Prostate specific antigen precursor                                              |
| SMP_006510 | 71834857 gi  | Prostate specific antigen precursor,Prostate specific antigen precursor.,Q8NCW4_ |
| Smp_119130 | 71834855 gi  | prostate-specific antigen isoform 4 preproprotein [Homo sapiens]                 |
| Smp_112090 | 4502173 gi   | Prostate-specific antigen precursor (EC 3.4.21.77) (PSA) (Kallikrein-DE 3) (Se   |
| SMP_006510 | 4502173 gi   | Prostate-specific antigen precursor (EC 3.4.21.77) (PSA) (Kallikrein-DE 3) (Se   |
| Smp_112090 | 21618357 gi  | Prostate-type hippostasin                                                        |
| SMP_006510 | 21618357 gi  | Prostate-type hippostasin,Kallikrein-11 precursor (EC 3.4.21.-) (Hippostasin) (T |



## Supplemental Information 1: Cercarial Elastase Interactions

|            |               |                                                                                  |
|------------|---------------|----------------------------------------------------------------------------------|
| Smp_119130 | 68299793 gi   | Protease inhibitor H                                                             |
| SMP_006510 | 68299793 gi   | Protease inhibitor H,Q8N5P0_chr5:147611170-147623020_P36 Hypothetical protein,   |
| Smp_006510 | 13994276 gi   | Protease serine 27 precursor (EC 3.4.21.-) (Marapsin) (Pancreasin)DE (Channel-   |
| SMP_006510 | 56606135 gi   | protease, serine, 37 precursor [Homo sapiens]                                    |
| SMP_119130 | 154759291 gi  | Protein Z-dependent protease inhibitor precursor (PZ-dependentDE protease inhi   |
| Smp_006520 | 154759291 gi  | Protein Z-dependent protease inhibitor precursor (PZ-dependentDE protease inhi   |
| SMP_006510 | 154759291 gi  | Protein Z-dependent protease inhibitor precursor (PZ-dependentDE protease inhi   |
| Smp_112090 | 4503635 gi    | Prothrombin precursor (EC 3.4.21.5) (Coagulation factor II) [Contains:Activation |
| SMP_006510 | 4503635 gi    | Prothrombin precursor (EC 3.4.21.5) (Coagulation factor II) [Contains:Activation |
| Smp_006510 | 11321636 gi   | PUTATIVE MAST CELL MMCP-7-LIKE II TYPTASE,PUTATIVE MAST CELL MMCP-7-LIKE II TYPT |
| SMP_112090 | 16751923 gi   | Putative multivalent protease inhibitor WFIKKN (WAP,DE follistatin/kazal, immu   |
| SMP_006510 | 16751923 gi   | Putative multivalent protease inhibitor WFIKKN (WAP,DE follistatin/kazal, immu   |
| SMP_006510 | 116812593 gi  | putative solute carrier organic anion transporter family member 1B7 [Homo sapien |
| SMP_006510 | 66347875 gi   | R subcomponent of complement component 1                                         |
| Smp_006510 | 19743898 gi   | Receptor tyrosine kinase-like orphan receptor 2,Receptor tyrosine kinase-like or |
| Smp_006510 | 50659098 gi   | Regeneration associated muscle protease, isoform a,Regeneration associated muscl |
| SMP_006510 | 11863156 gi   | Reversion-inducing-cysteine-rich protein with kazal motifs,Reversion-inducing cy |
| Smp_119130 | 32454741 gi   | Rheumatoid arthritis related antigen RA-A47                                      |
| SMP_006510 | 32454741 gi   | Rheumatoid arthritis related antigen RA-A47,P50454_chr11:75003703-75009433_L6P_A |
| SMP_006510 | 4506117 gi    | S plasma protein                                                                 |
| Smp_006510 | 50363237 gi   | S39329_11 glandular kallikrein-1,S39329_11 glandular kallikrein-1,               |
| Smp_119130 | 33598937 gi   | scavenger receptor class F member 2 isoform 2 precursor [Homo sapiens]           |
| Smp_119130 | 24586659 gi   | Scavenger receptor class F member 2 precursor (Scavenger receptorDE expressed    |
| SMP_006510 | 78190498 gi   | Secreted modular calcium-binding protein 1                                       |
| SMP_112090 | 110225349 gi  | serine (or cysteine) proteinase inhibitor, clade A (alpha-1 antiproteinase, anti |
| SMP_006510 | 110225349 gi  | serine (or cysteine) proteinase inhibitor, clade A (alpha-1 antiproteinase, anti |
| Smp_006520 | 27777657 gi   | Serine (Or cysteine) proteinase inhibitor, clade A (Alpha-1DE antiproteinase,    |
| SMP_006510 | 27777657 gi   | Serine (Or cysteine) proteinase inhibitor, clade A (Alpha-1DE antiproteinase,    |
| SMP_112090 | 8393956 gi    | Serine (Or cysteine) proteinase inhibitor, clade B (Ovalbumin), memberDE 13,HU   |
| SMP_006510 | 8393956 gi    | Serine (Or cysteine) proteinase inhibitor, clade B (Ovalbumin), memberDE 13,HU   |
| Smp_006510 | 5902072 gi    | Serine (Or cysteine) proteinase inhibitor, clade B (Ovalbumin), memberDE 3,Ser   |
| SMP_119130 | 5902072 gi    | Serine (Or cysteine) proteinase inhibitor, clade B (Ovalbumin), memberDE 3,squ   |
| Smp_006510 | 40254871 gi,1 | Serine protease                                                                  |
| Smp_112090 | 47551347 gi   | Serine protease 1-like protein 1                                                 |
| SMP_006510 | 47551347 gi   | Serine protease 1-like protein 1,AAQ88957_chr19:636719-646430_L143P,GLGL782      |
| SMP_006510 | 148806923 gi  | serine protease 45 [Homo sapiens]                                                |

## Supplemental Information 1: Cercarial Elastase Interactions

|            |              |                                                                                  |
|------------|--------------|----------------------------------------------------------------------------------|
| Smp_006520 | 148806900 gi | serine protease 48 precursor [Homo sapiens]                                      |
| Smp_006520 | 33695155 gi  | Serine protease hepsin (EC 3.4.21.-) (Transmembrane protease, serineDE 1) [Con   |
| SMP_006510 | 33695155 gi  | Serine protease hepsin (EC 3.4.21.-) (Transmembrane protease, serineDE 1) [Con   |
| Smp_112090 | 4506141 gi   | Serine protease HTRA1 precursor (EC 3.4.21.-) (L56)                              |
| SMP_119130 | 4506141 gi   | Serine protease HTRA1 precursor (EC 3.4.21.-) (L56),Serine protease HTRA1 precu  |
| SMP_006510 | 4506141 gi   | Serine protease HTRA1 precursor (EC 3.4.21.-) (L56),Serine protease HTRA1 precu  |
| Smp_112090 | 7019477 gi   | Serine protease HTRA2, mitochondrial precursor (EC 3.4.21.-) (HighDE temperatu   |
| SMP_006510 | 7019477 gi   | Serine protease HTRA2, mitochondrial precursor (EC 3.4.21.-) (HighDE temperatu   |
| SMP_006510 | 94536774 gi  | Serine protease inhibitor Kazal type 9                                           |
| SMP_006510 | 92110017 gi  | serine protease inhibitor Kazal-type 13 precursor [Homo sapiens]                 |
| SMP_112090 | 7657453 gi   | Serine protease inhibitor Kazal-type 4 precursor (Peptide PEC-60DE homolog),Se   |
| SMP_006510 | 7657453 gi   | Serine protease inhibitor Kazal-type 4 precursor (Peptide PEC-60DE homolog),Se   |
| SMP_006510 | 74027261 gi  | serine protease inhibitor Kazal-type 5 isoform b precursor [Homo sapiens]        |
| SMP_006510 | 122937482 gi | serine protease inhibitor Kazal-type 8 precursor [Homo sapiens]                  |
| Smp_119130 | 110626171 gi | Serine protease inhibitor Kunitz type 3                                          |
| SMP_006510 | 110626171 gi | Serine protease inhibitor Kunitz type 3,Serine protease inhibitor Kunitz type 3  |
| SMP_112090 | 10863909 gi  | Serine protease inhibitor, Kunitz type, 2,043291_chr19:43447373-43474483_Q3H_C47 |
| SMP_006510 | 10863909 gi  | Serine protease inhibitor, Kunitz type, 2,043291_chr19:43447373-43474483_Q3H_C47 |
| SMP_006510 | 14602453 gi  | serine protease,(P57727) Splice isoform B of P57727                              |
| SMP_006510 | 40254871 gi  | Serine protease,Transmembrane protease, serine 11E precursor (EC 3.4.21.-) (Seri |
| SMP_006510 | 122937297 gi | Serpin A11 precursor                                                             |
| SMP_006510 | 156071456 gi | serpin B11 [Homo sapiens]                                                        |
| SMP_112090 | 28076869 gi  | Serpin B4 (Squamous cell carcinoma antigen 2) (SCCA-2) (Leupin),SQUAMOUS CELL CA |
| SMP_006510 | 28076869 gi  | Serpin B4 (Squamous cell carcinoma antigen 2) (SCCA-2) (Leupin),SQUAMOUS CELL CA |
| SMP_119130 | 5453886 gi   | Serpin I2 precursor (Myoepithelium-derived serine protease inhibitor)DE (Pancp   |
| Smp_006510 | 5453886 gi   | Serpin I2 precursor (Myoepithelium-derived serine protease inhibitor)DE (Pancp   |
| SMP_006510 | 110225347 gi | SERPINA9 protein,Serpin peptidase inhibitor, clade A (Alpha-1 antiproteinase,DE  |
| Smp_112090 | 31377629 gi  | Similar to carboxypeptidase A5                                                   |
| Smp_006520 | 24111255 gi  | Similar to carboxypeptidase A6                                                   |
| Smp_006510 | 14702169 gi  | Similar to plasminogen activator, tissue,Similar to plasminogen activator, tissu |
| SMP_006510 | 39725934 gi  | Similar to serine (or cysteine) proteinase inhibitor, clade F (alpha-2DE antip   |
| SMP_006520 | 9790233 gi   | Solute carrier organic anion transporter family member 1B3 (SoluteDE carrier f   |
| SMP_006510 | 9790233 gi   | Solute carrier organic anion transporter family member 1B3 (SoluteDE carrier f   |
| SMP_006510 | 8394291 gi   | Solute carrier organic anion transporter family member 1C1 (SoluteDE carrier f   |
| Smp_006520 | 5032095 gi   | Solute carrier organic anion transporter family member 2A1 (Solutecarrier family |
| SMP_006510 | 5032095 gi   | Solute carrier organic anion transporter family member 2A1 (Solutecarrier family |

## Supplemental Information 1: Cercarial Elastase Interactions

|            |                |                                                                                   |
|------------|----------------|-----------------------------------------------------------------------------------|
| Smp_006520 | 13569932 gi    | Solute carrier organic anion transporter family member 5A1 (Solute carrier family |
| SMP_006510 | 13569932 gi    | Solute carrier organic anion transporter family member 5A1 (Solute carrier family |
| SMP_006510 | 93277099 gi    | solute carrier organic anion transporter family member 6A1 [Homo sapiens]         |
| SMP_119130 | 11545873 gi    | SPARC-related modular calcium-binding protein 1 precursor (SecretedDE modular     |
| SMP_006510 | 11545873 gi    | SPARC-related modular calcium-binding protein 1 precursor (SecretedDE modular     |
| Smp_119130 | 10863911 gi    | SPINK2 protein (Fragment)                                                         |
| SMP_006510 | 10863911 gi    | SPINK2 protein (Fragment),,Serine protease inhibitor Kazal-type 2 precursor (Acr  |
| Smp_006520 | 6005882 gi     | SPUVE protein                                                                     |
| Smp_006520 | 11415040 gi    | Suppressor of tumorigenicity 14 (EC 3.4.21.-) (Serine protease 14)DE (Matripta    |
| SMP_006510 | 11415040 gi    | Suppressor of tumorigenicity 14 (EC 3.4.21.-) (Serine protease 14)DE (Matripta    |
| Smp_119130 | 148886654 gi   | sushi, von Willebrand factor type A, EGF and pentraxin domain-containing protein  |
| SMP_006510 | 113431326 gi   | temporary entry                                                                   |
| SMP_006510 | 55743098 gi,5! | temporary entry,                                                                  |
| SMP_006510 | 118498341 gi   | temporary entry, chymotrypsinogen B1 [Homo sapiens]                               |
| SMP_006510 | 29244926 gi    | temporary entry, corin [Homo sapiens],                                            |
| SMP_006510 | 148806900 gi   | temporary entry, epidermis-specific serine protease-like protein [Homo sapiens]   |
| SMP_006510 | 148231605 gi   | temporary entry, ovochymase 2 [Homo sapiens]                                      |
| SMP_006510 | 116256363 gi   | temporary entry, transmembrane protease, serine 13 [Homo sapiens],transmembrane   |
| SMP_006510 | 118498350 gi   | temporary entry,cDNA FLJ77335, highly similar to Homo sapiens chymotrypsinogen B  |
| SMP_006510 | 71834855 gi    | temporary entry,kallikrein 3, (prostate specific antigen), isoform CRA_i          |
| SMP_006510 | 110815798 gi   | temporary entry,Ovochymase 1                                                      |
| Smp_119130 | 4759164 gi     | Testican-1 precursor (SPOCK protein)                                              |
| SMP_006510 | 4759164 gi     | Testican-1 precursor (SPOCK protein),                                             |
| SMP_006510 | 93141003 gi    | Testican-3 precursor (SPARC/osteonectin, CWCV, and Kazal-like domainsDE proteo    |
| Smp_006510 | 33186882 gi    | Testis serine protease 2 precursor,Testis serine protease 2 precursor,Testis ser  |
| Smp_112090 | 7019563 gi     | Testis-specific protease-like protein 50 precursor                                |
| SMP_006510 | 7019563 gi     | Testis-specific protease-like protein 50 precursor,                               |
| Smp_006510 | 21614531 gi    | testisin,testisin,(Q9Y6M0) Splice isoform 2 of Q9Y6M0                             |
| Smp_112090 | 5803197 gi     | Testisin precursor (EC 3.4.21.-) (Eosinophil serine protease 1) (ESP-DE 1)        |
| SMP_006510 | 5803197 gi     | Testisin precursor (EC 3.4.21.-) (Eosinophil serine protease 1) (ESP-DE 1),Tes    |
| SMP_006510 | 4507377 gi     | thyroxine-binding globulin precursor                                              |
| SMP_119130 | 5730091 gi     | Tissue factor pathway inhibitor 2,P48307_chr7:93128164-93132019_V102A_R231Q TISS  |
| SMP_006510 | 5730091 gi     | Tissue factor pathway inhibitor 2,P48307_chr7:93128164-93132019_V102A_R231Q TISS  |
| SMP_006510 | 73760409 gi    | Tissue factor pathway inhibitor beta,                                             |
| SMP_119130 | 73760409 gi    | Tissue factor pathway inhibitor beta,,Tissue factor pathway inhibitor beta        |
| Smp_006510 | 4505861 gi     | Tissue-type plasminogen activator precursor (EC 3.4.21.68) (tPA) (t-DE PA) (t-    |

## Supplemental Information 1: Cercarial Elastase Interactions

|            |               |                                                                                   |
|------------|---------------|-----------------------------------------------------------------------------------|
| Smp_112090 | 12383051 gi   | TMEFF2 protein precursor (Transmembrane protein TENB2) (TPEF)DE (Transmembrane    |
| SMP_006510 | 12383051 gi   | TMEFF2 protein precursor (Transmembrane protein TENB2) (TPEF)DE (Transmembrane    |
| Smp_119130 | 145701030 gi  | TMPRSS3                                                                           |
| SMP_006510 | 145701030 gi  | TMPRSS3,AAQ88894_chr11:117485670-117526277_R172Q_K193E_G203V                      |
| Smp_006510 | 169209600 gi  | TPSAB1 protein,TPSAB1 protein,TPSAB1 protein.,TPS1 protein                        |
| Smp_119130 | 32698841 gi   | Transmembrane protease, serine 11B (EC 3.4.21.-)                                  |
| SMP_006510 | 32698841 gi   | Transmembrane protease, serine 11B (EC 3.4.21.-),Putative uncharacterized protei  |
| Smp_119130 | 4758508 gi    | Transmembrane protease, serine 11D precursor (EC 3.4.21.-) (AirwayDE trypsin-I    |
| SMP_006510 | 4758508 gi    | Transmembrane protease, serine 11D precursor (EC 3.4.21.-) (AirwayDE trypsin-I    |
| Smp_112090 | 32698940 gi   | Transmembrane protease, serine 12 (EC 3.4.21.-)                                   |
| SMP_006510 | 32698940 gi   | Transmembrane protease, serine 12 (EC 3.4.21.-),Q86WS5_chr12:49523015-49567560_Y  |
| Smp_006520 | 14602459 gi   | Transmembrane protease, serine 2 precursor (EC 3.4.21.-) [Contains:DE Transmem    |
| SMP_006510 | 14602459 gi   | Transmembrane protease, serine 2 precursor (EC 3.4.21.-) [Contains:DE Transmem    |
| Smp_112090 | 13173471 gi   | Transmembrane protease, serine 3 (EC 3.4.21.-) (Serine protease TADG-DE 12) (T    |
| SMP_006510 | 13173471 gi   | Transmembrane protease, serine 3 (EC 3.4.21.-) (Serine protease TADG-DE 12) (T    |
| Smp_006510 | 15451940 gi   | Transmembrane protease, serine 4 (EC 3.4.21.-) (Membrane-type serineprotease 2)   |
| Smp_006520 | 13540535 gi   | Transmembrane protease, serine 5 (EC 3.4.21.-) (Spinesin)                         |
| SMP_006510 | 13540535 gi   | Transmembrane protease, serine 5 (EC 3.4.21.-) (Spinesin),Transmembrane protease  |
| SMP_006510 | 29568105 gi   | Transmembrane protein with EGF-like and two follistatin-like domainsDE 1,         |
| SMP_006520 | 29568105 gi   | Transmembrane protein with EGF-like and two follistatin-like domainsDE 1,,Tran    |
| SMP_006510 | 94400921 gi,9 | Trypsin domain containing 1                                                       |
| SMP_006510 | 94400923 gi   | Trypsin domain containing 1,                                                      |
| Smp_006510 | 48255915 gi   | Trypsin X3 (KFIL2540),Trypsin X3 (KFIL2540),                                      |
| Smp_112090 | 4506145 gi    | Trypsinogen A                                                                     |
| SMP_006510 | 4506145 gi    | Trypsinogen A,Trypsinogen A (Protease, serine, 1) (Trypsin 1),Trypsin-1 precursor |
| Smp_112090 | 4506147 gi    | Trypsinogen E (Protease, serine, 2) (Trypsin 2) (Anionic trypsinogen)             |
| SMP_006510 | 4506147 gi    | Trypsinogen E (Protease, serine, 2) (Trypsin 2) (Anionic trypsinogen),Trypsinoge  |
| Smp_112090 | 13775595 gi   | Tryptase beta-1 precursor (EC 3.4.21.59) (Tryptase-1) (Tryptase I)                |
| SMP_006510 | 13775595 gi   | Tryptase beta-1 precursor (EC 3.4.21.59) (Tryptase-1) (Tryptase I),Tryptase beta  |
| Smp_112090 | 110578663 gi  | tryptophan/serine protease [Homo sapiens]                                         |
| SMP_006510 | 110578663 gi  | tryptophan/serine protease [Homo sapiens], hypothetical protein LOC203074 [Homo   |
| SMP_006510 | 110431331 gi  | Type II transmembrane serine protease 7 precursor (HypotheticalDE protein FLJ1    |
| Smp_006510 | 6005820 gi    | unnamed protein product,unnamed protein product,Solute carrier organic anion tra  |
| Smp_112090 | 4505863 gi    | Urokinase-type plasminogen activator (Plasminogen activator,DE urokinase)         |
| SMP_006510 | 4505863 gi    | Urokinase-type plasminogen activator (Plasminogen activator,DE urokinase),Plas    |
| Smp_119130 | 5032223 gi    | VESPR                                                                             |

## Supplemental Information 1: Cercarial Elastase Interactions

|                   |                     |                                                                                         |
|-------------------|---------------------|-----------------------------------------------------------------------------------------|
| <b>Smp_006520</b> | <b>39930511 gi</b>  | <b>VPPP1921</b>                                                                         |
| <b>SMP_006510</b> | <b>39930511 gi</b>  | <b>VPPP1921,AAQ88713_chr18:55252112-55513543_V193G</b>                                  |
| <b>Smp_006520</b> | <b>21703706 gi</b>  | <b>WAP four-disulfide core domain 10A</b>                                               |
| <b>SMP_006510</b> | <b>21703706 gi</b>  | <b>WAP four-disulfide core domain 10A,,WAP four-disulfide core domain protein 10A p</b> |
| <b>Smp_119130</b> | <b>20069858 gi</b>  | <b>WAP four-disulfide core domain 12</b>                                                |
| <b>SMP_006510</b> | <b>20069858 gi</b>  | <b>WAP four-disulfide core domain 12,Q8WWY7_chr20:44437919-44438517_G23R,,WAP four-</b> |
| <b>Smp_006510</b> | <b>21717822 gi</b>  | <b>WAP four-disulfide core domain 5,WAP four-disulfide core domain 5,probable prote</b> |
| <b>Smp_119130</b> | <b>153946389 gi</b> | <b>WAP four-disulfide core domain 8</b>                                                 |
| <b>SMP_006510</b> | <b>153946389 gi</b> | <b>WAP four-disulfide core domain 8,Q8IUA0_chr20:44866097-44893315_N137 WAP four-di</b> |
| <b>Smp_119130</b> | <b>56699495 gi</b>  | <b>WAP four-disulfide core domain protein 2 precursor (Major epididymis-DE specif</b>   |

***VAL Venom Allergen Proteins Interactions***

| <b>S. masoni</b> | <b>Human</b> | <b>Human Protein</b>                                                             |
|------------------|--------------|----------------------------------------------------------------------------------|
| Smp_123550       | 25121984 gi  | BA719J20.1.2 (Acidic epididymal glycoprotein-like 1n),(P54107) Splice isoform Sh |
| Smp_123550       | 5174675 gi   | Cysteine-rich secretory protein 3 precursor (CRISP-3) (SGP28 protein),Cysteine-r |
| Smp_123550       | 110825980 gi | Glioma pathogenesis-related protein,Glioma pathogenesis-related protein 1 precur |
| Smp_123550       | 70780384 gi  | HGSC289 (OTTHUMP00000016309),Peptidase inhibitor 16,,HGSC289                     |
| Smp_123550       | 30425410 gi  | OTTHUMP00000031047 (R3H domain (Binds single-stranded nucleic acids)DE contain   |
| Smp_123550       | 13899303 gi  | Putative secretory protein (CocoaCrisp) (Trypsin inhibitor HI)DE (Hypothetical   |
| Smp_123550       | 4507671 gi   | Testis-specific protein TPX1 e isoform (Testis-specific protein TPX1 bDE isofo   |

## Supplemental Information 3: Calpain Interactions

| <b>Calpain Interactions</b> |              |                                                                                             |
|-----------------------------|--------------|---------------------------------------------------------------------------------------------|
| <b>S. mansoni</b>           | <b>Human</b> | <b>Human Protein</b>                                                                        |
| Smp_157500                  | 27765074 gi  | (P20807) Splice isoform II of P20807                                                        |
| SMP_137410                  | 27765074 gi  | (P20807) Splice isoform II of P20807,AF127765_1 calpain 3; calcium activated neu            |
| Smp_137410                  | 27765076 gi  | (P20807) Splice isoform IV of P20807                                                        |
| Smp_137410                  | 27765072 gi  | AF127764_1 calpain 3; calcium activated neutral protease; CAPN3; CL1                        |
| Smp_157500                  | 13186302 gi  | Calpain 10 (EC 3.4.22.17) (Calcium-activated neutral proteinase 10)DE (CANP 10              |
| Smp_157500                  | 27765078 gi  | Calpain 3, isoform e (CAPN3 protein)                                                        |
| Smp_157500                  | 4502565 gi   | Calpain small subunit 1 (CSS1) (Calcium-dependent protease smallDE subunit 1)               |
| Smp_157500                  | 41152101 gi  | Calpain-13 (EC 3.4.22.-)                                                                    |
| Smp_157500                  | 4557405 gi   | Calpain-3 (EC 3.4.22.54) (Calpain L3) (Calpain p94) (Calcium-activatedneutral pr            |
| Smp_157500                  | 13186316 gi  | Calpain-6 (Calpamodulin) (CalpM) (Calpain-like protease X-linked)                           |
| SMP_137410                  | 13186316 gi  | Calpain-6 (Calpamodulin) (CalpM) (Calpain-like protease X-linked),Q9Y6Q1_chrX:10            |
| Smp_157500                  | 7656959 gi   | Calpain-7 (EC 3.4.22.-) (PalB homolog) (PalBH)                                              |
| SMP_157500                  | 5729758 gi   | Calpain-9 (EC 3.4.22.-) (Digestive tract-specific calpain) (nCL-4)DE (CG36 pro              |
| Smp_137410                  | 12408656 gi  | Cell proliferation-inducing protein 30                                                      |
| Smp_157500                  | 20149675 gi  | EF hand domain containing 2                                                                 |
| Smp_157500                  | 21361462 gi  | EH-domain containing 2 (EH domain-containing protein-2)                                     |
| Smp_137410                  | 30240932 gi  | EH-domain-containing protein 1 (Testilin) (hPAST1)                                          |
| Smp_157500                  | 4503593 gi   | Epidermal growth factor receptor pathway substrate 15                                       |
| Smp_157500                  | 10864047 gi  | Epidermal growth factor receptor substrate EPS15R                                           |
| Smp_137410                  | 7705383 gi   | GC36 protein                                                                                |
| SMP_089460.                 | 7705383 gi   | GC36 protein,                                                                               |
| Smp_157500                  | 157389005 gi | Hypothetical protein                                                                        |
| Smp_137410                  | 4507207 gi   | Hypothetical protein DKFZp459G0314                                                          |
| Smp_157500                  | 38707981 gi  | Hypothetical protein FLJ45489                                                               |
| SMP_089460.                 | 38707981 gi  | Hypothetical protein FLJ45489,                                                              |
| Smp_137410                  | 6912388 gi   | Hypothetical protein GCA                                                                    |
| Smp_137410                  | 48476342 gi  | Mitochondrial ATP-Mg/Pi carrier (Mitochondrial Ca <sup>2+</sup> -dependent soluteDE carrier |
| Smp_157500                  | 113865939 gi | Novel S100 calcium-binding protein (S100 calcium binding protein A7-DE like 2)              |
| Smp_157500                  | 6912582 gi   | Peflin (PEF protein) (Penta-EF hand domain containing 1) (CDNADE FLJ10558 fis,              |
| Smp_137410                  | 113411704 gi | PREDICTED: calpain 8 [Homo sapiens]                                                         |
| Smp_137410                  | 88943801 gi  | PREDICTED: similar to calpain 8 [Homo sapiens]                                              |
| Smp_157500                  | 88952798 gi  | PREDICTED: similar to calpain isoform 4 [Homo sapiens]                                      |

## Supplemental Information 3: Calpain Interactions

|                    |                     |                                                                                         |
|--------------------|---------------------|-----------------------------------------------------------------------------------------|
| <b>Smp_137410</b>  | <b>7019485 gi</b>   | <b>Programmed cell death 6</b>                                                          |
| <b>Smp_157500</b>  | <b>28827815 gi</b>  | <b>S100 calcium binding protein A15 (S100 calcium binding protein A7-likeDE 1)</b>      |
| <b>Smp_137410</b>  | <b>14161692 gi</b>  | <b>Similar to RIKEN cDNA 2310005G05 gene</b>                                            |
| <b>Smp_157500</b>  | <b>5032105 gi</b>   | <b>Small optic lobes homolog</b>                                                        |
| <b>SMP_089460.</b> | <b>5032105 gi</b>   | <b>Small optic lobes homolog,075808_chr16:536840-543514_G19C SMALL OPTIC LOBES HOMO</b> |
| <b>Smp_137410</b>  | <b>38679884 gi</b>  | <b>sorcin isoform B [Homo sapiens]</b>                                                  |
| <b>Smp_157500</b>  | <b>47078247 gi</b>  | <b>temporary entry</b>                                                                  |
| <b>SMP_089460.</b> | <b>47078247 gi</b>  | <b>temporary entry,</b>                                                                 |
| <b>Smp_137410</b>  | <b>31377581 gi</b>  | <b>Uncharacterized protein C17orf57</b>                                                 |
| <b>Smp_137410</b>  | <b>37577157 gi</b>  | <b>Unknown (protein for MGC:9155</b>                                                    |
| <b>SMP_089460.</b> | <b>37577157 gi</b>  | <b>Unknown (protein for MGC:9155,Calpain-5 (EC 3.4.22.-) (nCL-3) (htra-3),,Calpain</b>  |
| <b>Smp_157500</b>  | <b>89353291 gi,</b> | <b>5 unnamed protein product</b>                                                        |



## Supplemental Information 4: Cystatin Interactions

| <b><i>Cystatin Interactions</i></b> |                    |                                                                                          |
|-------------------------------------|--------------------|------------------------------------------------------------------------------------------|
| <b>S. mansoni</b>                   | <b>Human</b>       | <b>Human Protein</b>                                                                     |
| <b>SMP_006390</b>                   | <b>4503139 gi</b>  | <b>Cathepsin B, preproprotein, Cathepsin B precursor (EC 3.4.22.1) (Cathepsin B1) (A</b> |
| <b>SMP_006390</b>                   | <b>6042196 gi</b>  | <b>Cathepsin F precursor (EC 3.4.22.41) (CATSF), Q9UBX1_chr11:66106767-66111317_Q153</b> |
| <b>SMP_006390</b>                   | <b>4503151 gi</b>  | <b>Cathepsin K precursor (EC 3.4.22.38) (Cathepsin O) (Cathepsin X)DE (Cathepsin</b>     |
| <b>SMP_006390</b>                   | <b>23110960 gi</b> | <b>Cathepsin L2, CATHEPSIN L2 PRECURSOR (EC 3.4.22.43) (CATHEPSIN V) (CATHEPSIN U),,</b> |
| <b>SMP_006390</b>                   | <b>4557501 gi</b>  | <b>Cathepsin O precursor (EC 3.4.22.42), Cathepsin O precursor (EC 3.4.22.42),,</b>      |
| <b>SMP_006390</b>                   | <b>23110962 gi</b> | <b>Cathepsin S, P25774_chr1:147922107-147953821_S161 CATHEPSIN S PRECURSOR (EC 3.4.2</b> |
| <b>SMP_006390</b>                   | <b>22538442 gi</b> | <b>Cathepsin Z precursor (EC 3.4.22.-) (Cathepsin X) (Cathepsin P),</b>                  |
| <b>SMP_006390</b>                   | <b>4503155 gi</b>  | <b>CTSL protein (Cathepsin L) (Hypothetical protein DKFZp686A18159), CTSL protein (H</b> |
| <b>SMP_006390</b>                   | <b>23110955 gi</b> | <b>pro-cathepsin H preproprotein [Homo sapiens]</b>                                      |

## Supplemental Information 5: Tetraspanin Interactions

| <b><i>Tetraspanin Interactions</i></b> |                     |                                                                                        |
|----------------------------------------|---------------------|----------------------------------------------------------------------------------------|
| <b>S. mansoni</b>                      | <b>Human</b>        | <b>Human Protein</b>                                                                   |
| <b>Smp_100080</b>                      | <b>5032207 gi</b>   | <b>(Q96QS1) Splice isoform 2 of Q96QS1, tetraspanin</b>                                |
| <b>Smp_181530</b>                      | <b>4757944 gi</b>   | <b>CD81 antigen (26 kDa cell surface protein TAPA-1) (Target of the DE antiprolife</b> |
| <b>Smp_100080</b>                      | <b>21264580 gi</b>  | <b>Hypothetical 24.1 kDa protein, tetraspanin</b>                                      |
| <b>Smp_100080</b>                      | <b>145580605 gi</b> | <b>tetraspanin</b>                                                                     |
| <b>Smp_181530</b>                      | <b>145580605 gi</b> | <b>tetraspanin</b>                                                                     |

## Supplemental Information 6: Human Immunoglobulin Interactions

| <b><i>Human Immunoglobulin Interactions</i></b> |                                 |                     |                                                                |
|-------------------------------------------------|---------------------------------|---------------------|----------------------------------------------------------------|
| <b>S. mansoni</b>                               | <b>S. mansoni Protein</b>       | <b>Human</b>        | <b>Human Protein</b>                                           |
| <b>SMP_027400</b>                               | <b>Ankyrin, kinase,Serine/</b>  | <b>13994242 gi</b>  | <b>C-Cbl-interacting protein ige</b>                           |
| <b>SMP_031880</b>                               | <b>Immunoglobulin-like</b>      | <b>21361212 gi</b>  | <b>CTLA4,CYTOTOXIC T-LYMPHOCYTE PROTEIN 4</b>                  |
| <b>SMP_032970</b>                               | <b>Calcium-binding EF-han</b>   | <b>156616292 gi</b> | <b>OTTHUMP00000016605 ige</b>                                  |
| <b>SMP_043990</b>                               | <b>basigin</b>                  | <b>146229333 gi</b> | <b>allergin-1 precursor [Homo sapiens]</b>                     |
| <b>SMP_055500</b>                               | <b>DNA-directed DNA polyr</b>   | <b>21361212 gi</b>  | <b>CTLA4 IgG Proteins</b>                                      |
| <b>SMP_082490</b>                               | <b>Cyclin, A/B/D/E,Cyclin,</b>  | <b>112382241 gi</b> | <b>Proto-oncogene tyrosine-protein kinase</b>                  |
| <b>SMP_115130</b>                               | <b>Immunoglobulin-like</b>      | <b>23312371 gi</b>  | <b>CD40 type II isoform,</b>                                   |
| <b>SMP_127420</b>                               | <b>Cystathionine beta-synt</b>  | <b>156104869 gi</b> | <b>Chloride channel protein ige</b>                            |
| <b>SMP_129430</b>                               | <b>Transcription factor, MA</b> | <b>19923215 gi</b>  | <b>Myocyte-specific enhancer factor 2C IgG Proteins</b>        |
| <b>SMP_133590</b>                               | <b>C2 calcium-dependent n</b>   | <b>60097902 gi</b>  | <b>Filaggrin ige</b>                                           |
| <b>SMP_141410</b>                               | <b>Carbohydrate kinase, FC</b>  | <b>11231177 gi</b>  | <b>AF109683_1 leukocyte-associated Ig-like receptor 1b ige</b> |
| <b>SMP_148450</b>                               | <b>Chitinase II,Glycoside h</b> | <b>144226251 gi</b> | <b>(cartilage glycoprotein-39) ige</b>                         |
| <b>SMP_153170</b>                               | <b>Fibronectin, type III</b>    | <b>63055063 gi</b>  | <b>Fc gamma receptor I IgG Proteins</b>                        |
| <b>SMP_156630</b>                               | <b>Protein coding gene</b>      | <b>50511926 gi</b>  | <b>FCGR2B protein (Fragment) IgG Proteins</b>                  |
| <b>SMP_169240</b>                               | <b>SH2 motif,Src,Variant SI</b> | <b>21618338 gi</b>  | <b>(P40763) Splice isoform Del-701 of P40763 ige</b>           |
| <b>SMP_172070</b>                               | <b>Protein coding gene</b>      | <b>23312371 gi</b>  | <b>CD40 type II isoform IgG Proteins</b>                       |
